# Supplementary material for: Pyogenic Liver Abscess Correlates With Increased Risk of Acute Pancreatitis: A Population-Based Cohort Study
Source: PubMed Central journal article supplement (PMC4341002; doi:10.2188/jea.je20140152), 2015-03-05
Supplement: je-25-246-s001.pdf [file je-25-246-s001.pdf]

**eTable.** Disorders in the study

| <b>Disorders</b>       | <b>ICD-9-CM code</b>                                               |
|------------------------|--------------------------------------------------------------------|
| Pyogenic liver abscess | 572.0                                                              |
| Acute pancreatitis     | 577.0                                                              |
| Chronic pancreatitis   | 577.1                                                              |
| Pancreatic cancer      | 157                                                                |
| Amebic liver abscess   | 006.3                                                              |
| Diabetes mellitus      | 250                                                                |
| Hypertriglyceridemia   | 272.1                                                              |
| Biliary stones         | 574                                                                |
| Alcoholism             | 291, 303, 305.00,<br>305.01, 305.02,<br>305.03, 790.3 and<br>V11.3 |
| Hepatitis C            | V02.62, 070.41,<br>070.44, 070.51 and<br>070.54                    |
